# Supplementary material for: A DFT-D study on the reaction mechanism of selective catalytic reduction of NO by NH3 over the Fe2O3/Ni(111) surface
Source: Royal Society of Chemistry journal article supplement (doi:10.1039/d1nj00406a), 2021-01-01
Supplement: d1nj00406a1.pdf [file d1nj00406a1.pdf]

# **A DFT-D study on the reaction mechanism of selective catalytic reduction of NO by NH<sub>3</sub> over the Fe<sub>2</sub>O<sub>3</sub>/Ni (111) surface**

Chaoyue Xie<sup>a</sup>, Baozhong Zhu<sup>a\*</sup>, Yunlan Sun<sup>a\*</sup>

<sup>a</sup> *School of Petroleum Engineering, Changzhou University, Changzhou, Jiangsu 213164, China*

## **Theoretical methods**

All DFT calculations were carried out in Vienna Ab-initio Simulation Package (VASP) version 5.4 [1-3]. The generalized gradient approximation (GGA) functional and Perdew-Burke-Ernzerhof (PBE) exchange association functional were used in the DFT calculation [4-6]. The Kohn-Sham equations were solved by the Projector Augmented Wave (PAW) method [7]. The reaction routes of gas molecules on the Fe<sub>2</sub>O<sub>3</sub>/Ni catalyst surface were investigated by the climbing-image nudged elastic band (CI-NEB) method [8-10]. To further understand the Van der Waals interaction between Ni surface and cluster or gas molecules, we introduced the density functional theory based on dispersion correction (DFT-D3) [11, 12]. In addition, for the convergence criteria of calculation system, the change of total energy and force acting on each ion should be less 10<sup>-5</sup> eV and 10<sup>-3</sup> eV/Å, respectively.

---

\*Corresponding author: bzzhu@cczu.edu.cn; ylsun@cczu.edu.cn

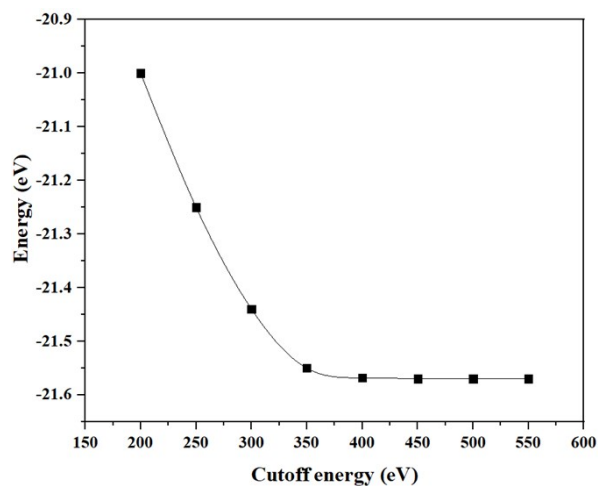

(a) Cut-off energy.

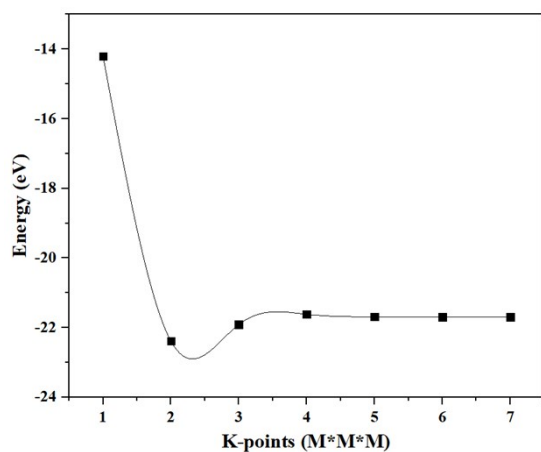

(b) K-points.

**Figure S1** Convergence tests of Ni bulk model.

**Table S1** Surface energies of Ni slab model.

| Slab surface        | Ni (111) | Ni (100) | Ni (110) |
|---------------------|----------|----------|----------|
| Surface energy (eV) | 23.36    | 27.25    | 38.94    |

**Table S2** Double-molecule adsorption energies and charge changes over the  $\text{Fe}_2\text{O}_3/\text{Ni}$  (111) surface.

| Gas                        | Adsorption energy (eV) | Bader charge changes (e)                      |
|----------------------------|------------------------|-----------------------------------------------|
| $\text{NH}_3 + \text{NO}$  | -2.935                 | $\text{NH}_3$ : -0.141, $\text{NO}$ : +0.280  |
| $\text{O}_2 + \text{NH}_3$ | -3.005                 | $\text{O}_2$ : +0.455, $\text{NH}_3$ : -0.132 |
| $\text{O}_2 + \text{NO}$   | -4.546                 | $\text{O}_2$ : +0.380, $\text{NO}$ : +0.268   |

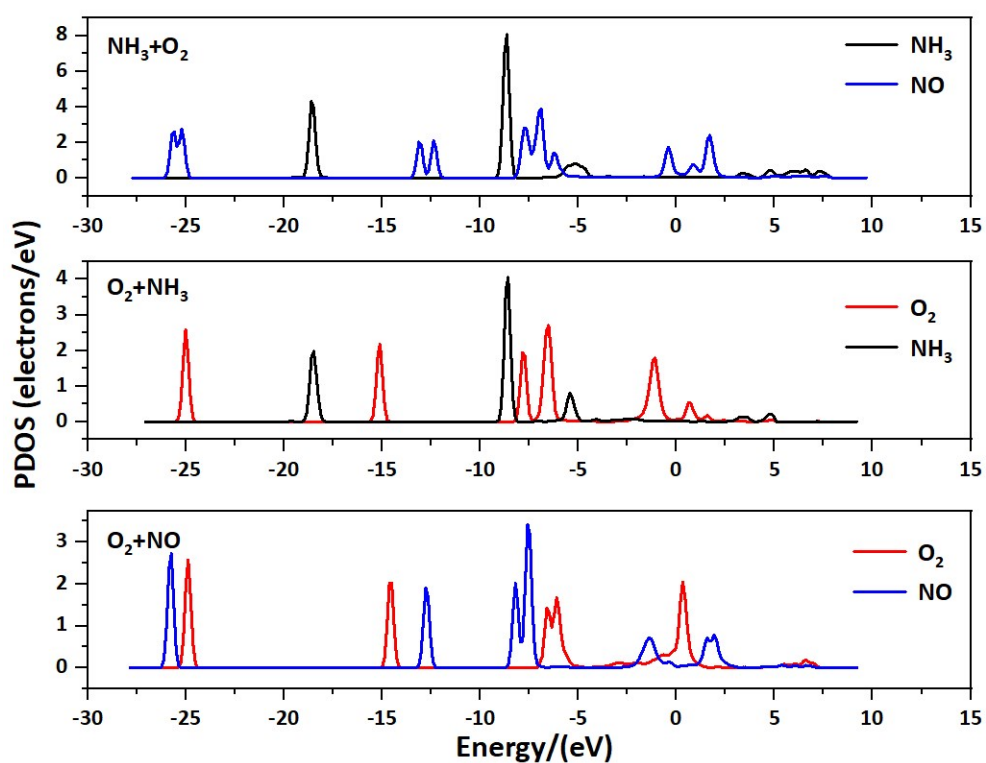

**Figure S2** PDOS results of double-molecule adsorption on the  $\text{Fe}_2\text{O}_3/\text{Ni}$  (111) surface.

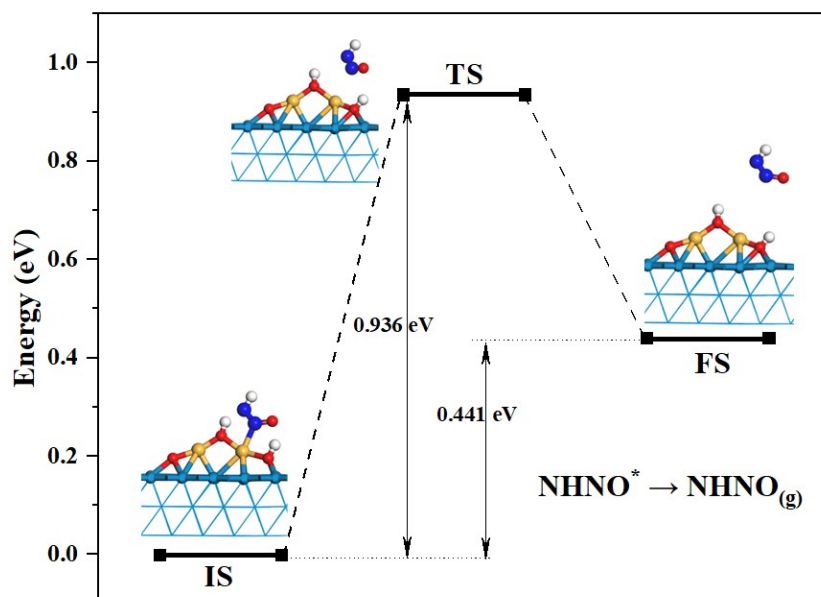

**Figure S3** Dissociation path of  $\text{NHNO}^*$  (Ni: dark blue, Fe: gold, O: red, N: blue, H: white).

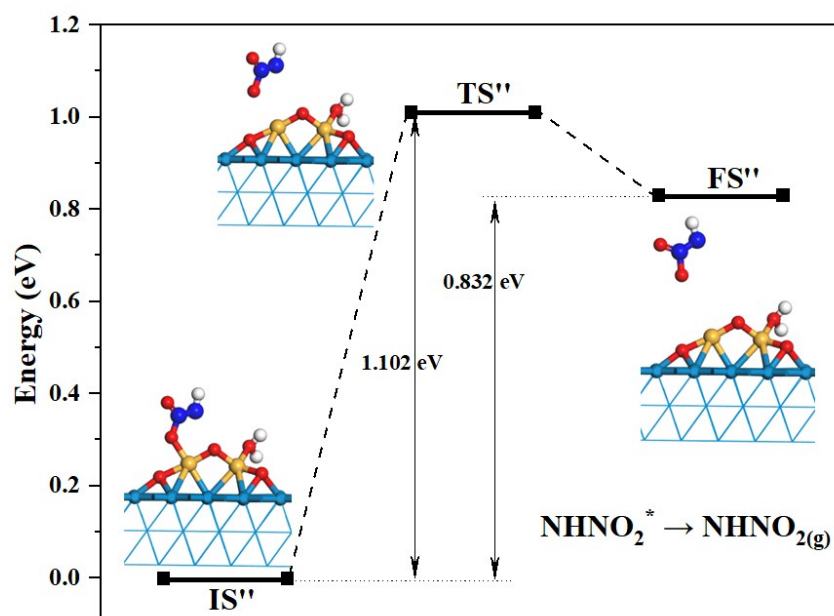

**Figure S4** Dissociation path of  $\text{NHNO}_2^*$  (Ni: dark blue, Fe: gold, O: red, N: blue, H: white).

## References

- [1] I. Georgieva, N. Trendafilova, N. Dodoff, D. Kovacheva, DFT study of the molecular and crystal structure and vibrational analysis of cisplatin, *Spectrochim. Acta: A*, 176 (2017) 58-66.
- [2] J. Hafner, Ab-initio simulations of materials using VASP: Density-functional theory and beyond, *J. Comput. Chem.*, 29 (2010) 2044-2078.
- [3] I. Tezsevin, R.A. van Santen, I. Onal, A density functional theory study of propylene epoxidation mechanism on Ag<sub>2</sub>O (001) surface, *Phys. Chem. Chem. Phys.*, 20 (2018) 26681-26687.
- [4] M. Cutini, M. Corno, P. Ugliengo, Method dependence of proline ring flexibility in the poly-l-proline type II polymer, *J. Chem. Theory Comput.*, 13 (2017) 370-379.
- [5] C.J. Rupp, S. Chakraborty, J. Anversa, R.J. Baierle, R. Ahuja, Rationalizing the hydrogen and oxygen evolution reaction activity of two-dimensional hydrogenated silicene and germanene, *ACS Appl. Mater. Interfaces*, 8 (2016) 1536-1544.
- [6] X. Tian, T. Wang, H. Jiao, Mechanism of coverage dependent CO adsorption and dissociation on the Mo (100) surface, *Phys. Chem. Chem. Phys.*, 19 (2017) 2186-2192.
- [7] J. Enkovaara, C. Rostgaard, J.J. Mortensen, J. Chen, M. Dułak, Electronic structure calculations with GPAW: a real-space implementation of the projector augmented-wave method, *J. Phys. Condens. Matter.*, 22 (2010) 253202-253225.
- [8] D. Li, B. Qu, H.Y. He, Y.G. Zhang, Y. Xu, B.C. Pan, R. Zhou, The influence of liquid Pb-Bi on the anti-corrosion behavior of Fe<sub>3</sub>O<sub>4</sub>: a first-principles study, *Phys. Chem. Chem. Phys.*, 18 (2016) 7789-7796.
- [9] T.Y. Lin, S.K. Lee, G.M. Huang, C.W. Huang, K.L. Tai, C.Y. Huang, Y.C. Lo, W.W. Wu, Electron beam irradiation-induced deoxidation and atomic flattening on the copper surface,

ACS Appl. Mater. Interfaces, 11 (2019) 40909-40915.

- [10] W.A.E. Prabowo, Subagjo, Nugraha, M.K. Agusta, A.G. Saputro, S. Rustad, R. Maezono, W.A. Diño, H.K. Dipojono, Density functional study of methyl butanoate adsorption and its C-O bonds cleavage on MoS<sub>2</sub>-based catalyst with various loads of Ni promoters, J. Phys. Condens. Matter., 31 (2019) 365001-365012.
- [11] S. Grimme, J. Antony, S. Ehrlich, H. Krieg, A consistent and accurate ab initio parametrization of density functional dispersion correction (DFT-D) for the 94 elements H-Pu, J. Chem. Phys., 132 (2010) 154104.
- [12] S. Grimme, S. Ehrlich, L. Goerigk, Effect of the damping function in dispersion corrected density functional theory, J. Comput. Chem., 32 (2011) 1456-1465.
